# Supplementary material for: Ultrafast proton transfer of the aqueous phenol radical cation
Source: Royal Society of Chemistry journal article supplement (doi:10.1039/d2cp00505k), 2022-01-01
Supplement: d2cp00505k1.pdf [file d2cp00505k1.pdf]

## Supplementary Information

### Ultrafast Proton Transfer of the Aqueous Phenol Radical Cation

Muhammad Shafiq Bin Mohd Yusof,<sup>1</sup> Hongwei Song,<sup>2</sup> Tushar Debnath,<sup>1</sup> Bethany Lowe,<sup>1</sup>  
Minghui Yang,<sup>2,3</sup> Zhi-Heng Loh<sup>1,\*</sup>

<sup>1</sup> Division of Chemistry and Biological Chemistry, School of Physical and Mathematical Sciences, Nanyang Technological University, 21 Nanyang Link, Singapore 637371, Singapore

<sup>2</sup> State Key Laboratory for Magnetic Resonance and Atomic and Molecular Physics, Wuhan Institute of Physics and Mathematics, Innovation Academy for Precision Measurement Science and Technology, Chinese Academy of Sciences, Wuhan 430071, China

<sup>3</sup> Wuhan National Laboratory for Optoelectronics, Huazhong University of Science and Technology, Wuhan 430071, China

---

\* Corresponding author. E-mail: [zhiheng@ntu.edu.sg](mailto:zhiheng@ntu.edu.sg)

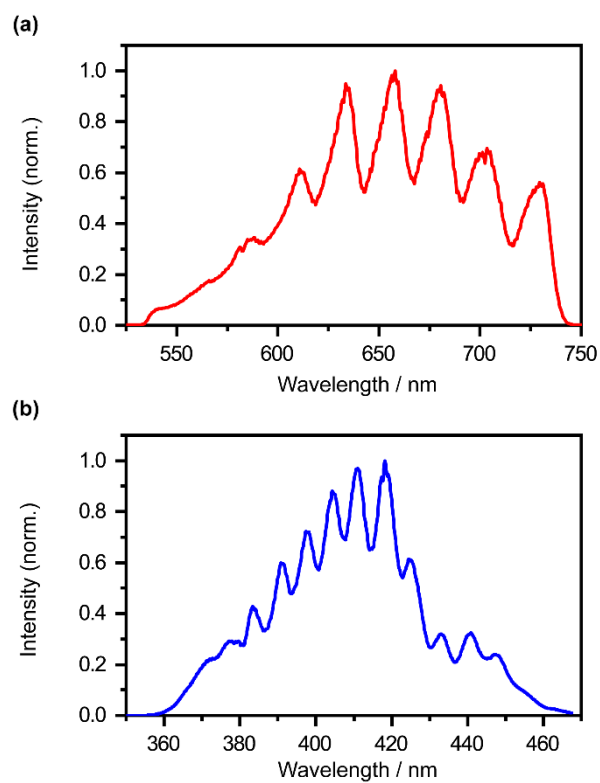

**Fig. S1. (a)** The visible-NIR ionizing pump spectrum ranges from 520 nm to 750 nm, with a centered wavelength of 636 nm. **(b)** The broadband near-UV probe spectrum ranges from 360 nm to 470 nm.

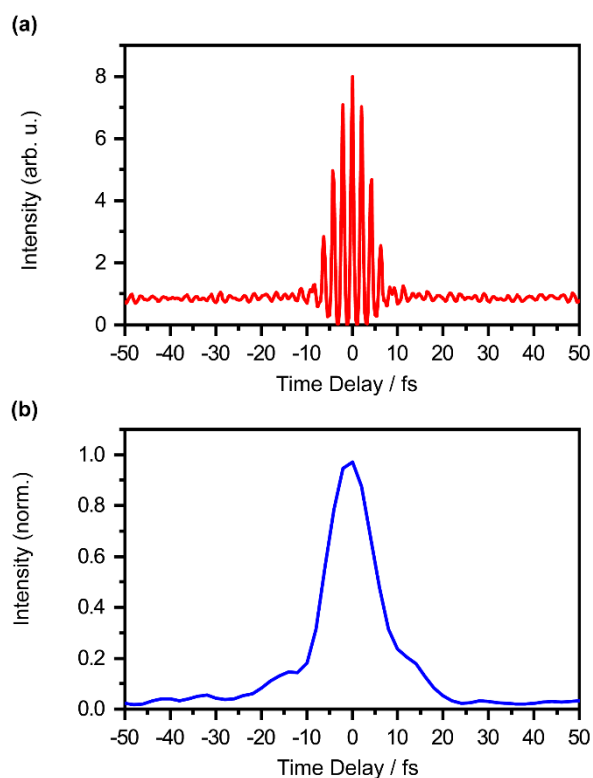

**Fig. S2. (a)** A second-order interferometric auto-correlation trace of the visible-NIR ionizing pump, measured in a 10- $\mu\text{m}$ -thick,  $\theta = 37.0$  deg Type I BBO crystal, reveals a pulse duration with full-width half-maximum (FWHM) of  $\sim 6.2$  fs. **(b)** The visible-NIR pump – near-UV probe cross-correlation, measured *via* difference frequency mixing in a 10-  $\mu\text{m}$ -thick,  $\theta = 37.0$  deg Type I BBO crystal, reveals a FWHM of 12 fs.

## Section S1: Photon-order Measurements for Strong-field Photoionization of Phenol in Aqueous Solution

A power-dependence measurement is performed to determine the photon order of the strong-field photoionization process of phenol in aqueous solution. For an  $N$ -photon photoionization process, the differential absorption signal,  $\Delta A$ , scales with intensity of the ionizing pump,  $I$ , i.e.  $\Delta A \propto I^N$ . The photon-order measurements are performed by using the near-UV probe, which measures the absorption of the phenol radical cation at a pump-probe time delay of 1.5 ps. The photon-order measurements are performed in the near-UV region as the phenol radical cation absorbs in the near-UV region. Hence, the absorption signal is proportional to the extent of the photoionization process.

In our study, the  $\Delta A$  against ionizing pump power spectrum is recorded for aqueous phenol, which is shown in Fig. S3. The  $\Delta A$  signal is then fitted with the following function:

$$\Delta A = \alpha I^N / [1 + (I/I_{sat})^N] \quad (1)$$

where  $\alpha$  is the amplitude,  $N$  is the photon order and  $I_{sat}$  is the saturation intensity. The converged fit when  $N = 4$  yields  $\alpha = (1.70 \pm 0.02) \times 10^{-58} \text{ cm}^2 \text{ W}^{-1}$  and  $I_{sat} = (8.39 \pm 0.38) \times 10^{13} \text{ W cm}^{-2}$ . The value of  $N$  indicates that the photoionization of aqueous phenol occurs *via* a four-photon process.

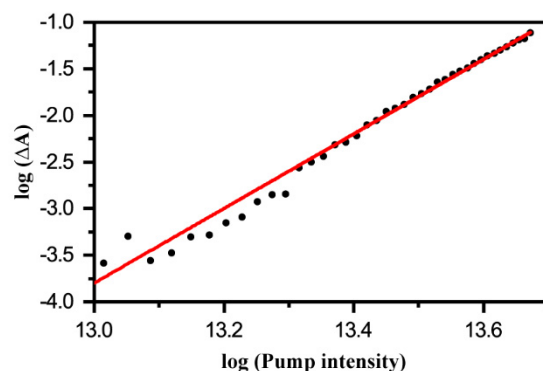

**Fig. S3.** Photon-order measurement for the strong-field photoionization of the phenol. Log-log plot of  $\Delta A$  vs. pump intensity reveals a four-photon process for the photoionization of aqueous phenol.

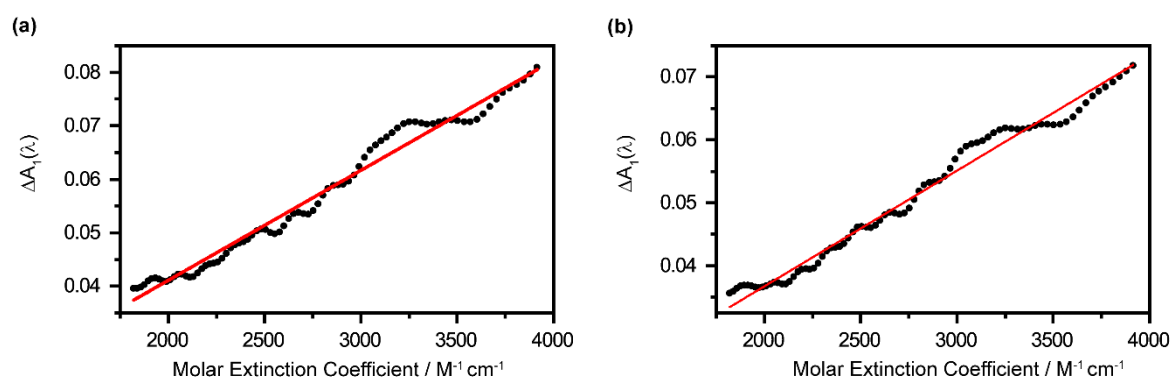

**Fig. S4.** Plot of  $\Delta A_1$  as a function of molar extinction coefficient of hydrated electron, and the linear fit function, in red for **(a)** ionized aqueous phenol and **(b)** ionized liquid water. The gradient of the linear fit function corresponds to the product of the concentration of hydrated electron,  $c_e$  and the sample path length,  $L$ , which are  $(2.056 \pm 0.007) \times 10^{-5} \text{ M}\cdot\text{cm}$  and  $(1.838 \pm 0.006) \times 10^{-5} \text{ M}\cdot\text{cm}$ , respectively.

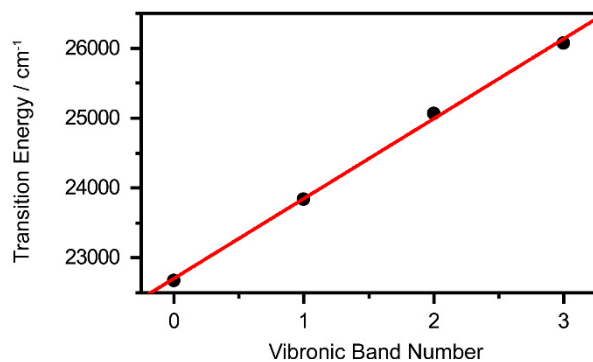

**Fig. S5.** A linear fit to the transition energies of the vibronic bands reveals a spacing of  $1135 \pm 34 \text{ cm}^{-1}$  for the vibronic progression.

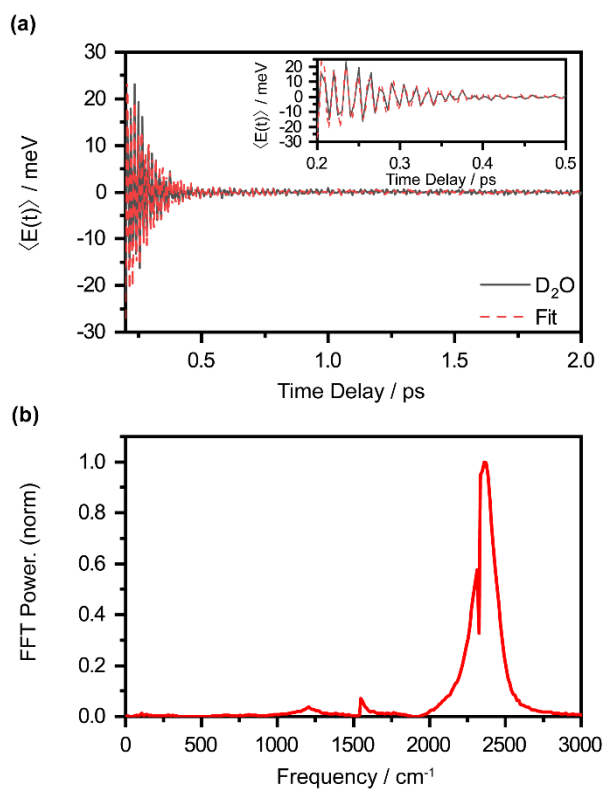

**Fig. S6. (a)** First-moment time trace,  $\langle E(t) \rangle$ , of the ionized liquid D<sub>2</sub>O. The inset shows the enlarged  $\langle E(t) \rangle$  from 0.2 ps to 0.5 ps. **(b)** FFT power spectrum of the first-moment time trace of ionized liquid D<sub>2</sub>O. Note that the O<sub>2</sub> and N<sub>2</sub> vibrational frequencies are also observed at  $1552 \text{ cm}^{-1}$  and  $2334 \text{ cm}^{-1}$ , respectively.

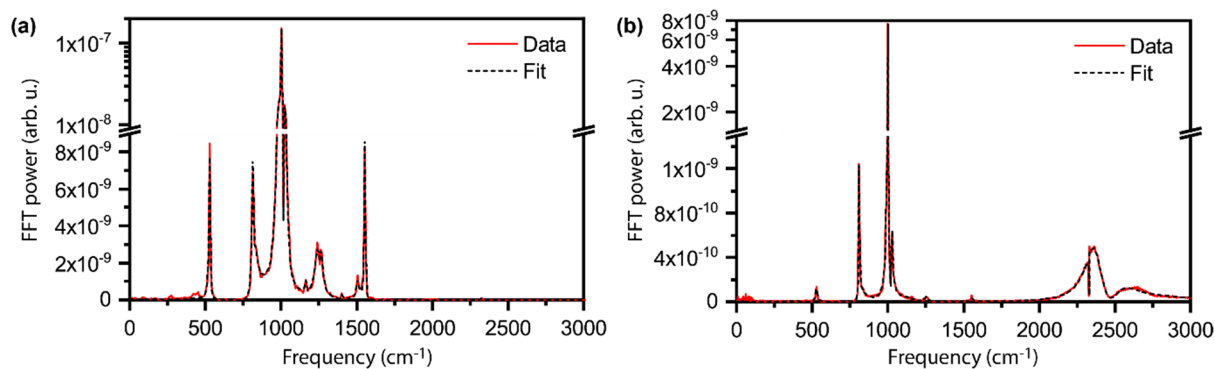

**Fig. S7.** FFT power spectra of the experimental first-moment time trace and its time-domain fit for ionized (a) PhOH and (b) PhOD. The good agreement between the experimental data and the fit suggests that the fit parameters obtained from the time-domain fit are reliable.

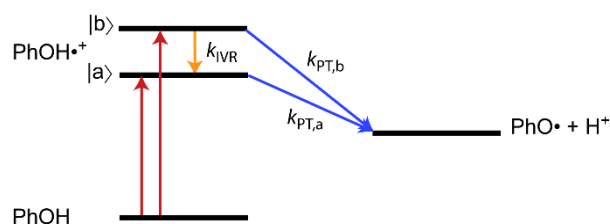

**Fig. S8.** Schematic energy level diagram of phenol (PhOH), phenol radical cation (PhOH<sup>•+</sup>) and phenoxy radical (PhO<sup>•</sup>). States  $|a\rangle$  and  $|b\rangle$  correspond to the vibrational ground and excited states of the vibrational modes of phenol radical cation with dominant OH or OD character. These vibrational states can undergo depopulation via proton transfer (PT), while the vibrationally excited state can also undergo intramolecular vibrational relaxation (IVR).

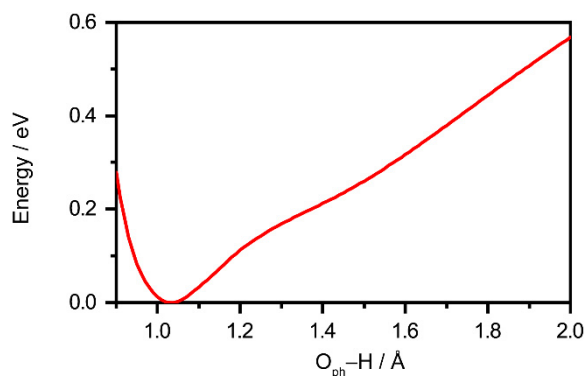

**Fig. S9.** Potential energy curve as a function of the phenol  $O_{\text{ph}}\text{-H}$  bond length for the microhydrated phenol radical cation,  $\text{PhOH}\cdot^+(\text{H}_2\text{O})_3$ .

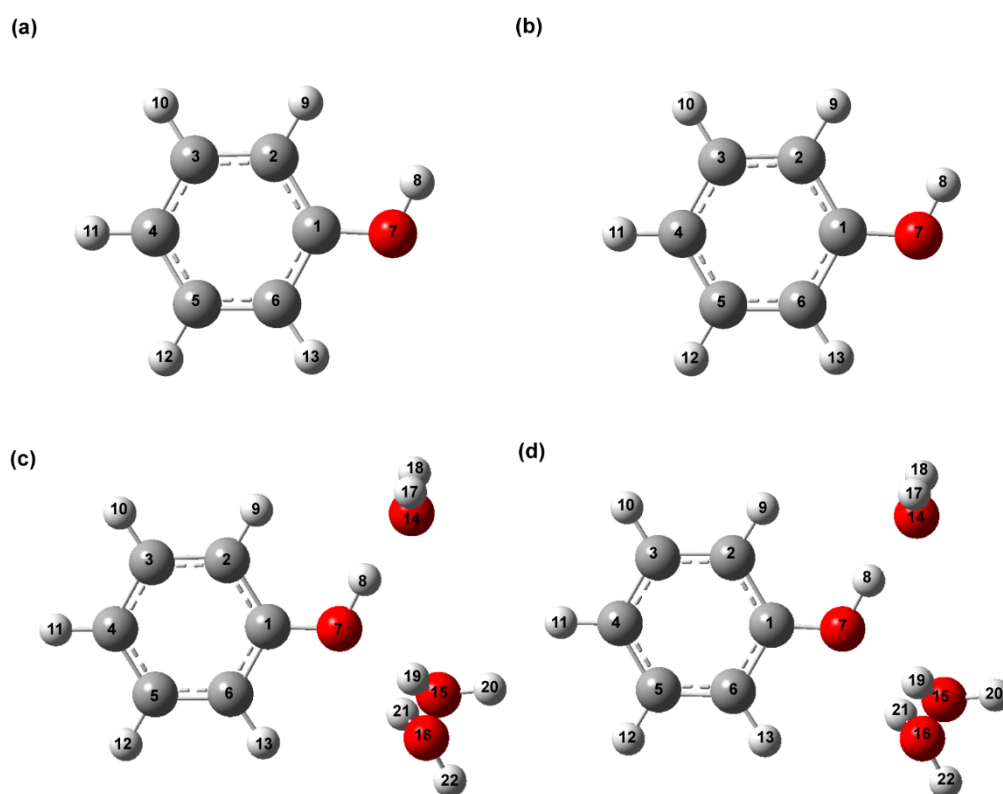

**Fig. S10.** The equilibrium geometries of the (a) phenol radical cation, (b) deuterated phenol radical cation, (c) microhydrated phenol radical cation,  $\text{PhOH}\cdot^+(\text{H}_2\text{O})_3$ , and (d) microhydrated deuterated phenol radical cation,  $\text{PhOD}\cdot^+(\text{D}_2\text{O})_3$ , in aqueous solution. The carbon, oxygen and hydrogen atoms are in gray, red and white respectively.



**Table S1.** Results of time-domain analysis of  $\langle E(t) \rangle$  obtained following the ionization of aqueous PhOH. The calculated vibrational frequencies and assignments are those of the microhydrated phenoxyl radical,<sup>1</sup> unless stated otherwise.

| Experimental                 |                    |                      |                        | Calc. Freq.<br>(cm <sup>-1</sup> ) | Assignment             |
|------------------------------|--------------------|----------------------|------------------------|------------------------------------|------------------------|
| Freq.<br>(cm <sup>-1</sup> ) | Amplitude<br>(meV) | Damping<br>Time (ps) | Phase<br>( $\pi$ -rad) |                                    |                        |
| 813 ± 1                      | 0.23 ± 0.02        | 0.44 ± 0.04          | 0.67 ± 0.03            | 818                                | Ring breath / CCC bend |
| 974 ± 2                      | 0.61 ± 0.09        | 0.24 ± 0.02          | 1.14 ± 0.06            | 988                                | CCC trig bend          |
| 1001 ± 1                     | 0.31 ± 0.01        | 2.32 ± 0.12          | 0.59 ± 0.01            | 1006                               | Ring breath / CH bend  |
| 1027 ± 1                     | 0.14 ± 0.01        | 1.39 ± 0.20          | 0.41 ± 0.03            | 1007                               | HCCCH torsion          |
| 1167 ± 3                     | 0.07 ± 0.02        | 1.35 ± 0.78          | 1.24 ± 0.01            | 1164                               | CH bend                |
| 1262 ± 3                     | 0.20 ± 0.11        | 0.85 ± 0.50          | 1.04 ± 0.16            | 1275                               | CH bend                |
| 1246 ± 4                     | 0.52 ± 0.01        | 0.18 ± 0.02          | 0.73 ± 0.07            | 1197                               | OH wag                 |
| 1497 ± 5                     | 1.09 ± 0.25        | 0.16 ± 0.02          | 1.89 ± 0.06            | 1414                               | OH bend                |
| 1559 ± 1                     | 0.02 ± 0.01        | 2.33 ± 0.99          | 0.40 ± 0.06            |                                    | O <sub>2</sub>         |
| 2330 ± 1                     | 0.04 ± 0.01        | 2.21 ± 0.42          | 1.97 ± 0.03            |                                    | N <sub>2</sub>         |

**Table S2.** Results of time-domain analysis of  $\langle E(t) \rangle$  obtained following the ionization of aqueous PhOD. The calculated vibrational frequencies and assignments are those of the microhydrated phenoxyl radical,<sup>1</sup> unless stated otherwise.

| Experimental                 |                    |                      |                        | Calc. Freq.<br>(cm <sup>-1</sup> ) | Assignment                           |
|------------------------------|--------------------|----------------------|------------------------|------------------------------------|--------------------------------------|
| Freq.<br>(cm <sup>-1</sup> ) | Amplitude<br>(meV) | Damping<br>Time (ps) | Phase<br>( $\pi$ -rad) |                                    |                                      |
| 528 ± 1                      | 0.21 ± 0.01        | 0.79 ± 0.04          | 1.51 ± 0.01            | 541                                | CCC bend                             |
| 809 ± 1                      | 0.32 ± 0.01        | 1.51 ± 0.07          | 0.18 ± 0.01            | 818                                | Ring breath /<br>CCC bend            |
| 996 ± 1                      | 0.76 ± 0.03        | 0.42 ± 0.02          | 0.37 ± 0.02            | 988                                | CCC trig bend                        |
| 1001 ± 1                     | 0.35 ± 0.01        | 3.01 ± 0.06          | 0.23 ± 0.01            | 1006                               | Ring breath /<br>CH bend             |
| 1026 ± 1                     | 0.22 ± 0.12        | 1.23 ± 0.11          | 0.24 ± 0.02            | 1007                               | HCCH torsion                         |
| 1253 ± 2                     | 0.18 ± 0.02        | 0.48 ± 0.06          | 0.41 ± 0.04            | 1295                               | CC str / CH<br>bend                  |
| 839 ± 4                      | 0.62 ± 0.10        | 0.14 ± 0.02          | 1.58 ± 0.05            | 870                                | OD Wag                               |
| 1166 ± 6                     | 2.55 ± 0.46        | 0.07 ± 0.01          | 0.69 ± 0.06            | 1170                               | OD Bend                              |
| 2373 ± 1                     | 21.87 ± 0.88       | 0.07 ± 0.01          | 1.86 ± 0.02            | 2401, 2489                         | OD Stretch from<br>D <sub>2</sub> O* |
| 2498 ± 3                     | 19.65 ± 1.65       | 0.06 ± 0.01          | 1.66 ± 0.02            |                                    |                                      |
| 1553 ± 1                     | 0.15 ± 0.01        | 0.54 ± 0.06          | 1.10 ± 0.03            |                                    | O <sub>2</sub>                       |
| 2330 ± 1                     | 0.07 ± 0.01        | 5.52 ± 0.40          | 1.30 ± 0.01            |                                    | N <sub>2</sub>                       |

\*The vibrational frequency of O–D stretching of D<sub>2</sub>O is from ref. 2.

**Table S3.** Density functional theory (DFT)-calculated vibrational frequencies of the isolated and microhydrated phenol radical cation,  $\text{PhOH}\cdot^+(\text{H}_2\text{O})_3$ , and deuterated phenol (phenol-OD) radical cation,  $\text{PhOD}\cdot^+(\text{D}_2\text{O})_3$ , embedded in a polarizable continuum (PCM). The assignment of atoms and vibrational modes are based on the equilibrium geometries of the phenol radical cation and the microhydrated phenol radical cation, as shown in Fig. S10.

|    | Phenol Radical Cation            |               | Phenol-OD Radical Cation         |               | Assignment             |
|----|----------------------------------|---------------|----------------------------------|---------------|------------------------|
|    | Calc. Freq. ( $\text{cm}^{-1}$ ) |               | Calc. Freq. ( $\text{cm}^{-1}$ ) |               |                        |
|    | Isolated                         | Microhydrated | Isolated                         | Microhydrated |                        |
| 1  | 396                              | 475           | 374                              | 457           | CO Bend                |
| 2  | 524                              | 534           | 519                              | 528           | CCC Bend               |
| 3  | 572                              | 578           | 568                              | 576           | CCC Bend               |
| 4  | 818                              | 821           | 808                              | 813           | Ring Breath / CCC Bend |
| 5  | 990                              | 995           | 989                              | 995           | CCC Trigonal Bend      |
| 6  | 995                              | 999           | 995                              | 999           | CH Bend / Ring Breath  |
| 7  | 1089                             | 1108          | 1103                             | 1112          | CH Bend / CC Stretch   |
| 8  | 1149                             | 1414          | 922                              | 1014          | OH (OD) Bend*          |
| 9  | 1186                             | 1201          | 1187                             | 1202          | CH Bend                |
| 10 | 1195                             | 1275          | 1166                             | 1334          | CH Bend                |
| 11 | 1356                             | 1379          | 1331                             | 1384          | CH Bend                |
| 12 | 1384                             | 1396          | 1378                             | 1395          | CC Stretch             |
| 13 | 1396                             | 1170          | 1390                             | 1112          | CC Stretch             |
| 14 | 1450                             | 1468          | 1429                             | 1435          | CC Stretch             |
| 15 | 1491                             | 1508          | 1486                             | 1501          | CO Stretch             |
| 16 | 1539                             | 1544          | 1538                             | 1543          | CC Stretch             |
| 17 | 1653                             | 1653          | 1652                             | 1651          | CC Stretch             |
| 18 | 3188                             | 3213          | 3188                             | 3213          | CH Stretch             |
| 19 | 3206                             | 3203          | 3206                             | 3203          | CH Stretch             |

|    |      |      |      |      |                    |
|----|------|------|------|------|--------------------|
| 20 | 3214 | 3209 | 3214 | 3209 | CH Stretch         |
| 21 | 3220 | 3219 | 3220 | 3219 | CH Stretch         |
| 22 | 3226 | 3223 | 3226 | 3223 | CH Stretch         |
| 23 | 3710 | 2593 | 2701 | 1909 | OH (OD) Stretch*   |
| 24 | 182  | 192  | 178  | 192  | Ring Deformation   |
| 25 | 362  | 372  | 356  | 379  | Ring Twist         |
| 26 | 432  | 439  | 425  | 450  | Ring Boat          |
| 27 | 601  | 1197 | 469  | 870  | OH (OD) Wag*       |
| 28 | 611  | 634  | 609  | 633  | CH Wag             |
| 29 | 783  | 813  | 780  | 813  | CH Wag / Ring Boat |
| 30 | 799  | 796  | 791  | 789  | CH Wag             |
| 31 | 945  | 958  | 940  | 958  | CH Wag / Ring Boat |
| 32 | 997  | 1017 | 995  | 1017 | HCCH Torsion       |
| 33 | 1007 | 1012 | 1006 | 1012 | HCCH Torsion       |

Note that modes 1 – 23 have A' symmetry and modes 24 – 33 have A'' symmetry.

## References

1. T. Debnath, M. S. B. Mohd Yusof, P. J. Low and Z.-H. Loh, *Nat. Commun.*, 2019, **10**, 2944.
2. S. R. Pattenaude, L. M. Streacker and D. Ben-Amotz, *J. Raman Spectrosc.*, 2018, **49**, 1860-1866.
